# Supplementary material for: PIRT the TRP Channel Regulating Protein Binds Calmodulin and Cholesterol-Like Ligands
Source: MDPI journal article supplement (doi:10.3390/biom10030478), 2020-03-21
Supplement: s1 [file s1]

## **Supplementary Materials**

# **PIRT the TRP Channel Regulating Protein Binds Calmodulin and Cholesterol-like Ligands**

**Nicholas J. Sisco<sup>1,†</sup>, Dustin D. Luu<sup>1,†</sup>, Minjoo Kim<sup>1,4</sup>, and Wade D. Van Horn<sup>1,4,\*</sup>**

<sup>1</sup> The School of Molecular Sciences, Arizona State University, Tempe, AZ 85287

<sup>2</sup> The Virginia G. Piper Biodesign Center for Personalized Diagnostics, Biodesign Institute, Arizona State University, Tempe, Arizona.

\* Correspondence: [wade.van.horn@asu.edu](mailto:wade.van.horn@asu.edu); Tel.: (480) 965-8322; Fax: (480) 965-2747

† These authors contributed equally to this work.

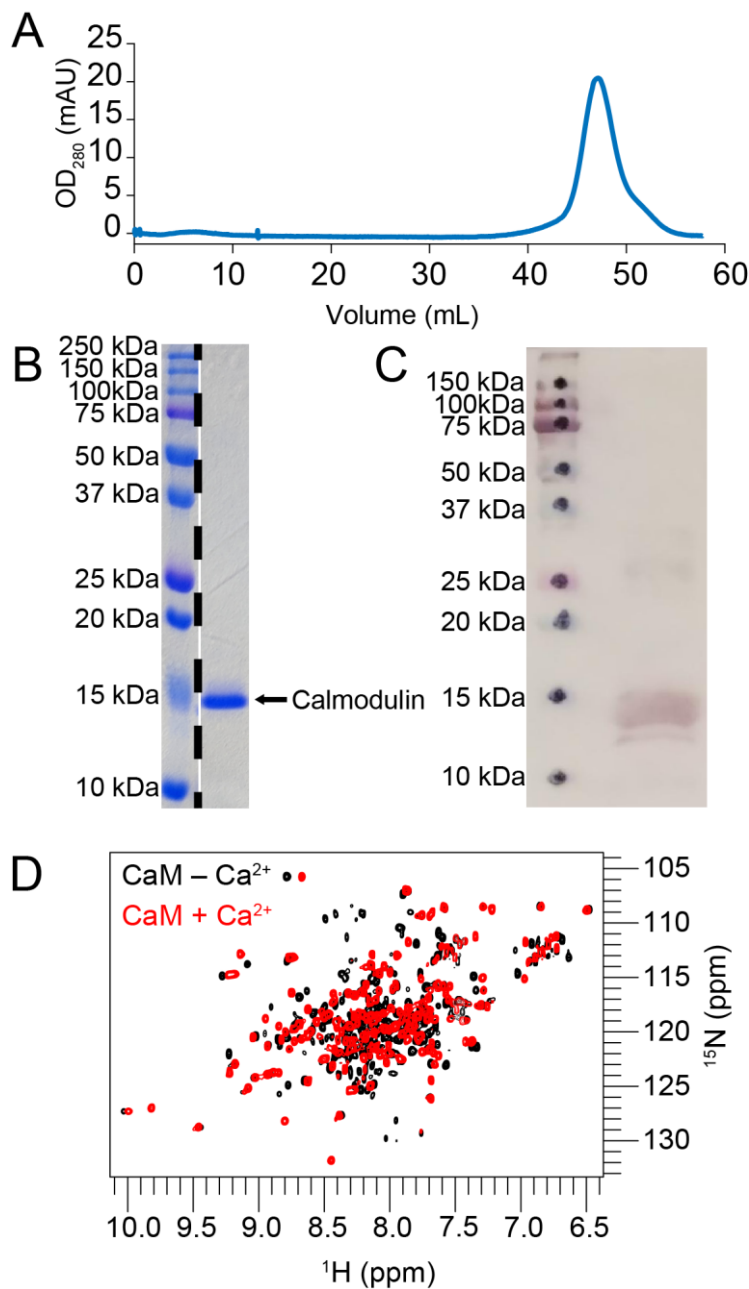

**Figure S1:** Characterization of Purified Calmodulin. (A) Purification of calmodulin with Ni-NTA and size exclusion chromatography (B) Purity was assessed with SDS-PAGE and (C) Identification with Western Blot of B. (D) Overlay of HSQC NMR spectra of <sup>15</sup>N-labeled apo (Ca<sup>2+</sup>-free, black) and holo (Ca<sup>2+</sup>-bound, red) calmodulin recorded at 25 °C.

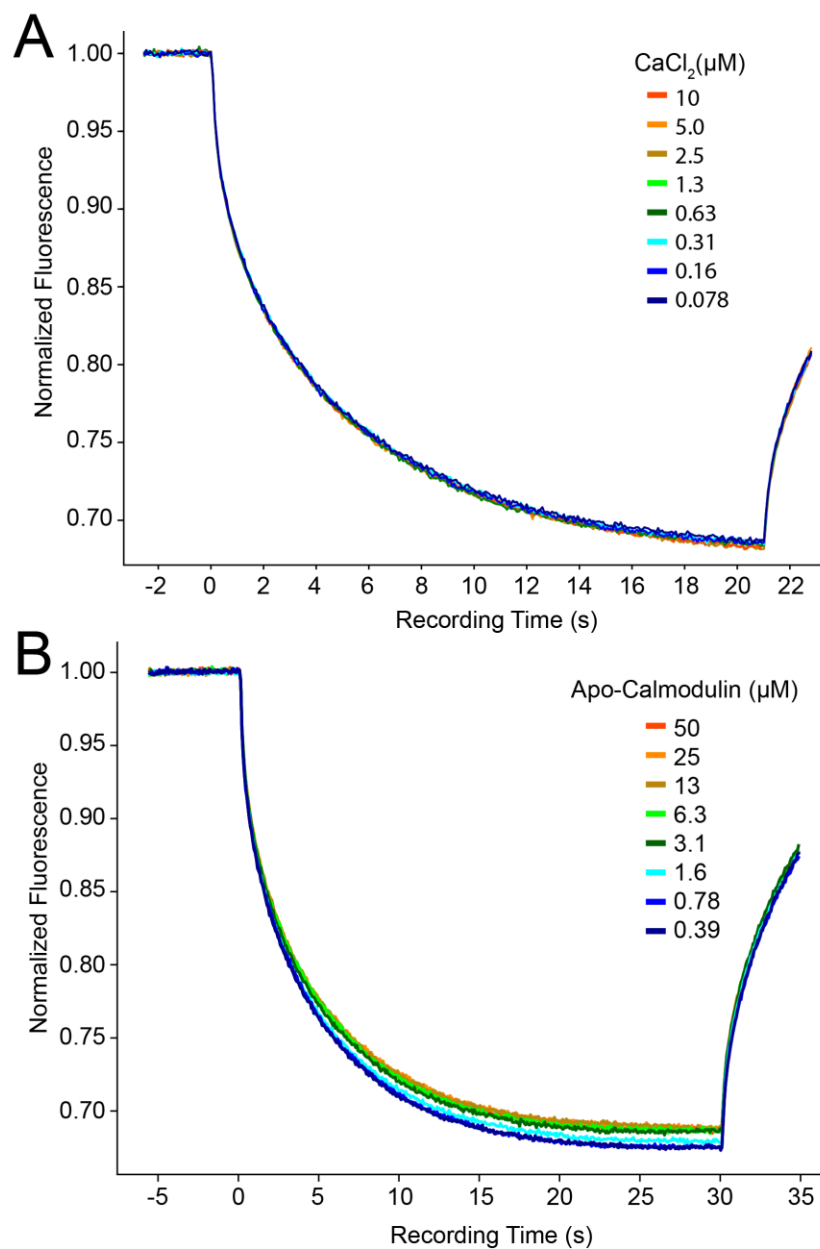

**Figure S2:** Representative PIRT microscale thermophoresis trace data. Non-binding was seen with varying concentration of (A) CaCl<sub>2</sub> with no coherent changes (Fig. S3A) in fluorescence. On the other hand, varying the concentration of (B) apo-calmodulin showed changes in fluorescence indicative of specific interactions (Fig. 2A). The fluorescence was normalized to 1 from the initial relative fluorescence.

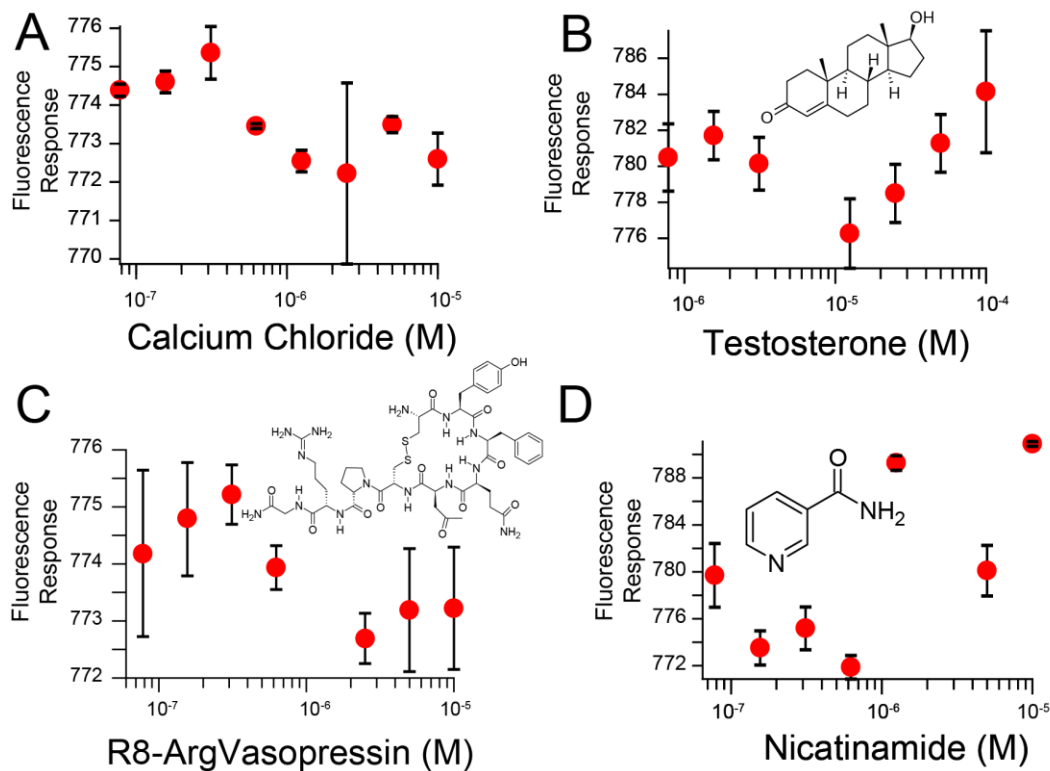

**Figure S3:** PIRT Ligand-independent thermophoresis. (A) Calcium chloride, (B) testosterone. (C) R8-arginine vasopressin and (D) niacinamide. There are small amounts of thermophoresis across the listed molecules; however, none of these fit to a binding isotherm.

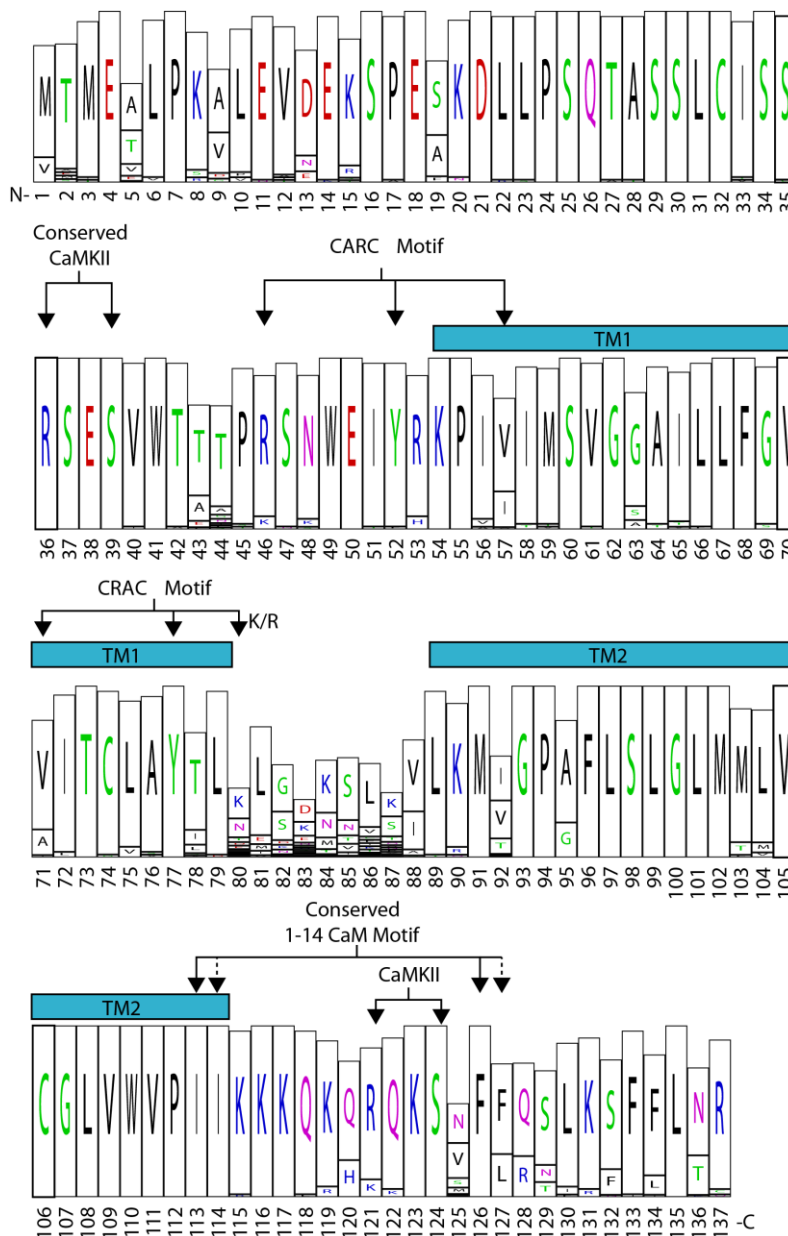

**Figure S4:** PIRT conservation across mammalian species. A web logo from multiple sequence alignment across mammalian species of PIRT [1]. Binding motifs for calmodulin, cholesterol, and calmodulin-dependent kinase II are shown here as conserved across 59 sequences of proteins named as phosphoinositide-interacting proteins. The two transmembrane regions shown in blue-shade as TM1 and TM2, respectively. Arrows point to key residues in the motifs: for CaMKII (R-X-X-S/T), CRAC/CARC (R/K-X<sub>1-5</sub>-Y/F-X<sub>1-5</sub>-L/V), and 1-14 calmodulin motif ([FILVW]-X<sub>12</sub>-[FILVW]). The height of the boxes stands for conservation across species with a taller box as more conservation. The 1-14 CaM binding motif is 100% conserved for solid arrows and 100% conserved for dotted arrows with the F replaced by L at the 14 position, which is still a key residue. CRAC and CARC domains show less conservation across the entire alignment, with the CRAC domain found outside of the TM1; however, we highlight it here to show the conservation. In human PIRT, the CARC domain is located at positions Ile72-Tyr77-Lys80. The N-terminal CaMKII phosphorylation motif is 100% conserved at position Arg36-Ser39 but is less conserved in the C-terminal motif.

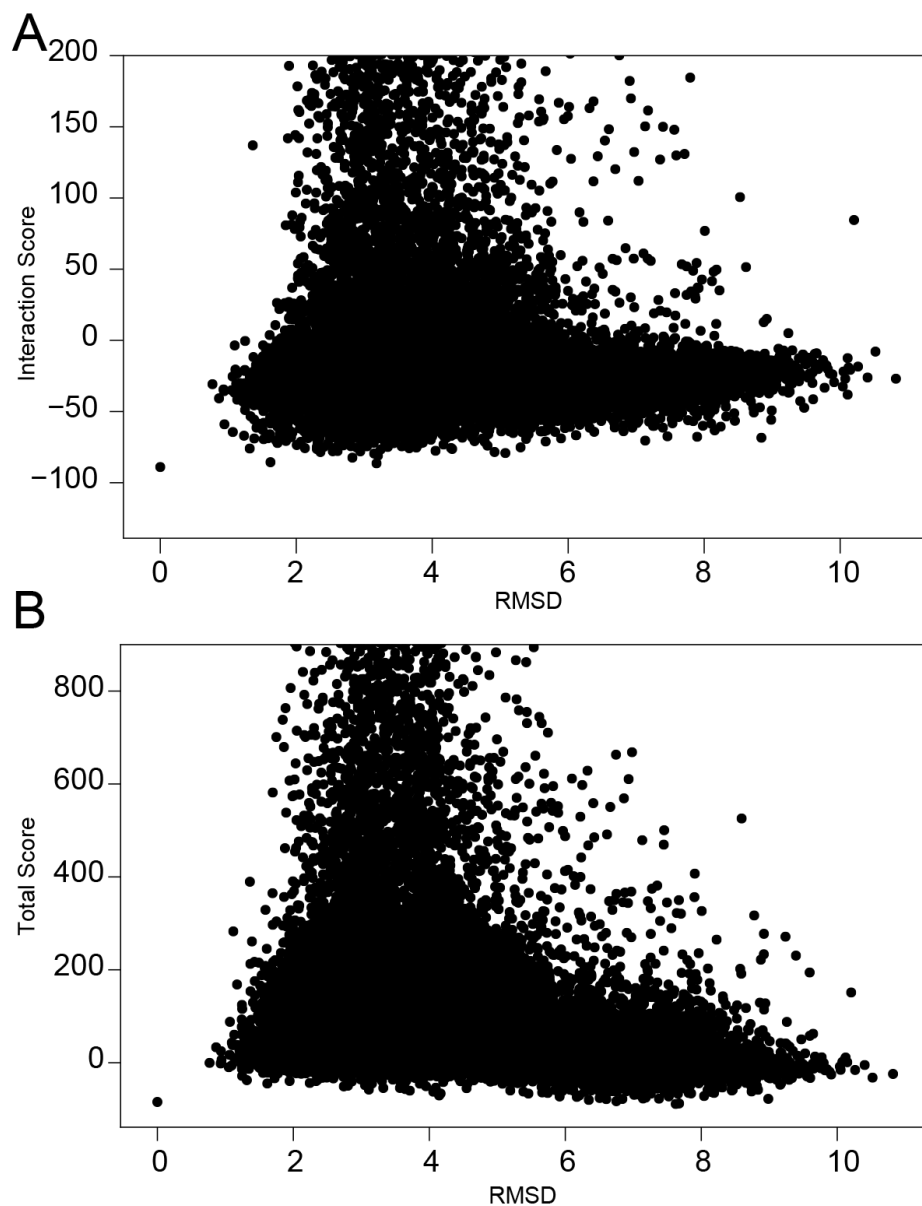

**Figure S5:** Unguided Rosetta ab initio flexible peptide docking. Docking shows good convergence for 80000 decoys of PIRT docking into calmodulin. **(A)** The interaction score is the difference between the scores of the individual chains scored independently during a docking run, and usually a smaller number suggests better docking interface. **(B)** The total score is the weight score from the output decoys, and a lower score represents lower energy and therefore more favorable. These results together show an energy funnel signifying convergence, with a broad range of RMSD showing a large conformation space was sampled.

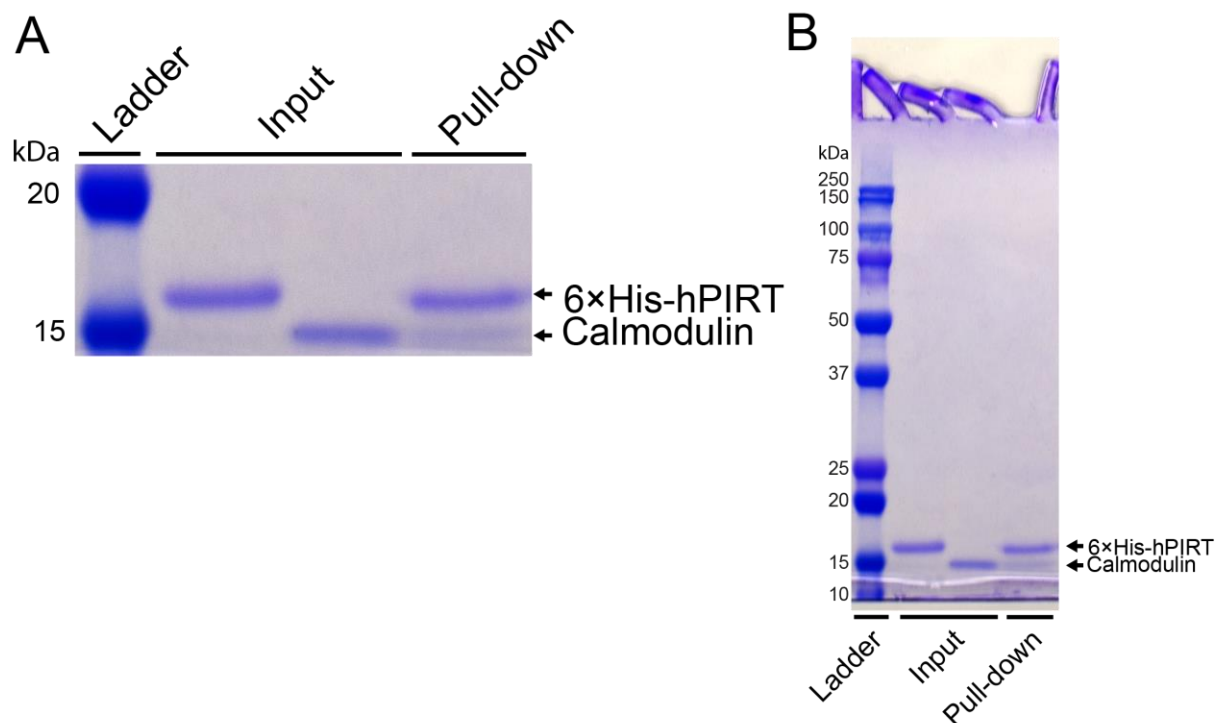

**Figure S6.** PIRT and calmodulin pull-down. **(A)** Coomassie-stained gel. His-tagged PIRT was mixed with cleaved calmodulin before binding to Ni-NTA resin. The bound complex was coeluted suggesting direct binding. **(B)** The SDS PAGE gel used for the cropped image shown in panel A.

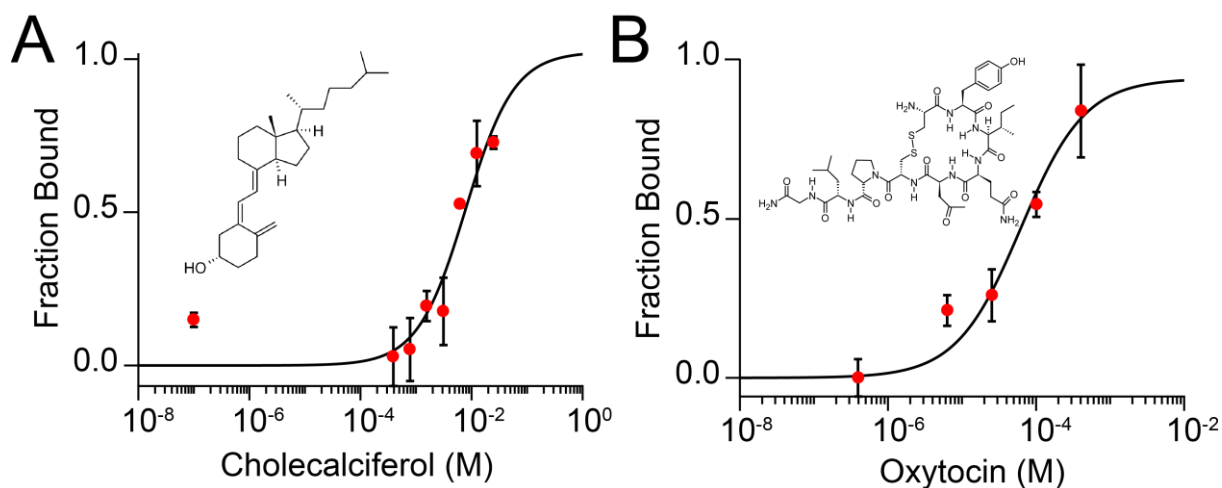

**Figure S7:** PIRT ligand-dependent thermophoresis. Thermophoresis of (A) cholecalciferol (B) water soluble oxytocin. The  $K_d$  are shown in Table 1. The hydrophobic ligands became insoluble in the MST buffer conditions above the concentrations used.

## References

1. Crooks, G.E. WebLogo: A Sequence Logo Generator. *Genome Res.* **2004**, *14*, 1188-1190, doi:10.1101/gr.849004.
